# Supplementary material
Source: PubMed Central journal article supplement (PMC9647592)
Supplement: PEDS_2022057978SupplementaryData.pdf [file PEDS_2022057978SupplementaryData.pdf]

## Supplemental Information

### DELPHI QUESTIONNAIRE

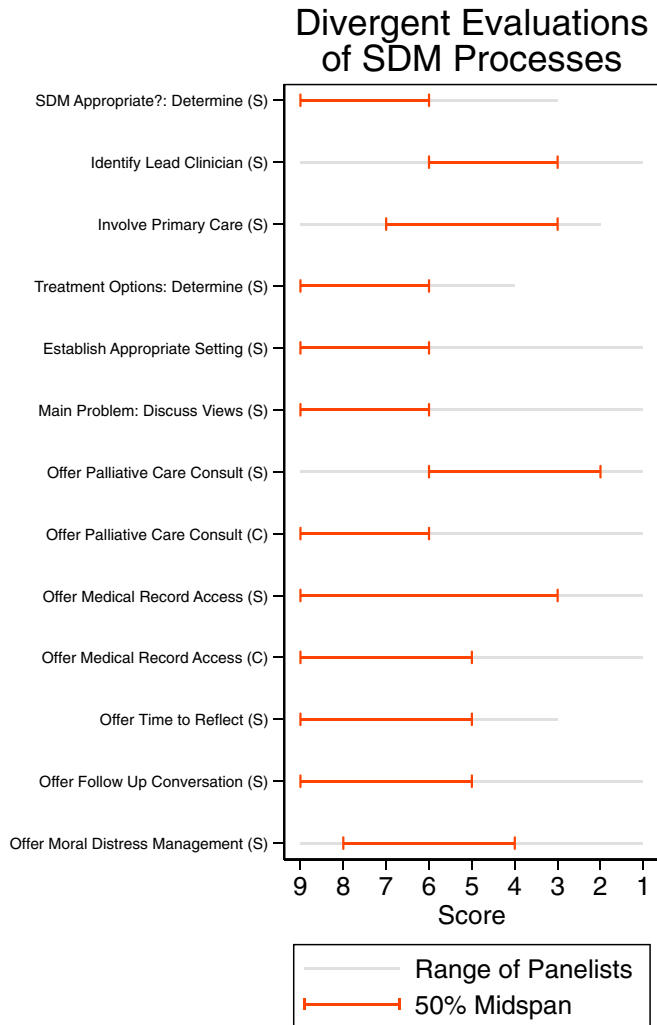

#### SUPPLEMENTAL FIGURE 4

Processes of pediatric SDM with disagreement.

## Divergent Evaluations of SDM Subitems

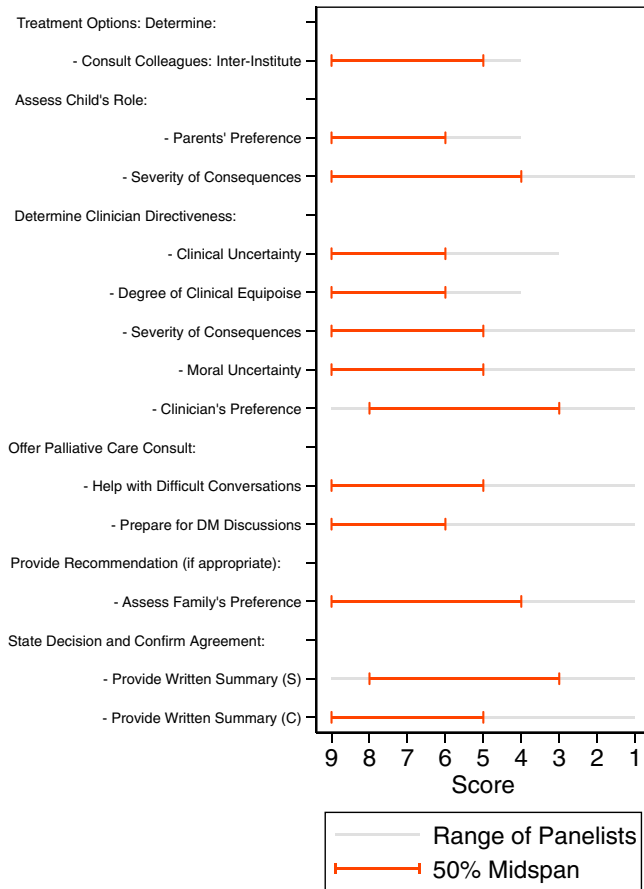

### SUPPLEMENTAL FIGURE 5

Subprocesses of pediatric SDM with disagreement.
